# Supplementary material for: Integrative genomic analyses identify MITF as a lineage survival oncogene amplified in malignant melanoma
Source: Springer Nature journal article supplement (doi:10.1038/nature03664), 2005-07-01
Supplement: 41586_2005_BFnature03664_MOESM2_ESM.pdf [file 41586_2005_BFnature03664_MOESM2_ESM.pdf]

# Supplementary Figure S2

Histogram  
Metastatic Specimens

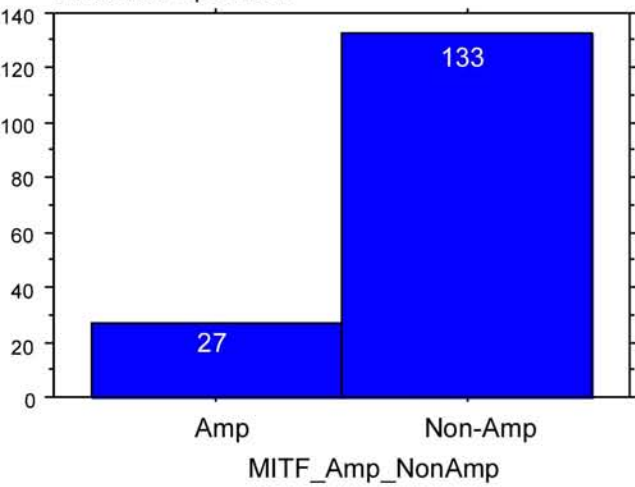

## Association with Clinical Parameters

(This information was not available for all cases.)

### Age at Diagnosis

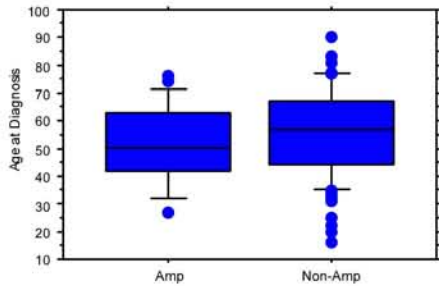

Unpaired t-test for Age at Diagnosis

|         | Count | Mean   | Variance | Std. Dev. | Std. Err |
|---------|-------|--------|----------|-----------|----------|
| Amp     | 24    | 51.667 | 194.841  | 13.959    | 2.849    |
| Non-Amp | 110   | 55.518 | 242.876  | 15.584    | 1.486    |

  

|  | Mean Diff. | DF  | t-Value | P-Value |
|--|------------|-----|---------|---------|
|  | -3.852     | 132 | -1.116  | .2663   |

### Gender

|        | MITF Status |         | Totals |
|--------|-------------|---------|--------|
|        | Amp         | Non-Amp |        |
| Female | 7           | 49      | 56     |
| Male   | 20          | 78      | 98     |
| Totals | 27          | 127     | 154    |

Chi Square: 1.541  
p=0.2144

### Anatomic Site

|             | MITF Status |         | Totals |
|-------------|-------------|---------|--------|
|             | Amp         | Non-Amp |        |
| Distant Met | 1           | 11      | 12     |
| Lymph Node  | 9           | 24      | 33     |
| Skin        | 3           | 13      | 16     |
| Totals      | 13          | 48      | 61     |

Chi Square: 1.967  
p=0.3740
