# Supplementary material for: Integrative genomic analyses identify MITF as a lineage survival oncogene amplified in malignant melanoma
Source: Springer Nature journal article supplement (doi:10.1038/nature03664), 2005-07-01
Supplement: 41586_2005_BFnature03664_MOESM3_ESM.pdf [file 41586_2005_BFnature03664_MOESM3_ESM.pdf]

# Supplementary Figure S3

## Clark Level

|        | MITF Status |         |    |
|--------|-------------|---------|----|
|        | Amp         | Non-Amp |    |
| III    | 1           | 6       | 7  |
| III/IV | 0           | 1       | 1  |
| IV     | 3           | 18      | 21 |
| V      | 0           | 3       | 3  |
| Totals | 4           | 28      | 32 |

Chi Square: 0.653  
p=0.8842

## Ulceration

|         | MITF Status |         | Totals |
|---------|-------------|---------|--------|
|         | Amp         | Non-Amp |        |
| Absent  | 0           | 6       | 6      |
| Present | 4           | 14      | 18     |
| Totals  | 4           | 20      | 24     |

Chi Square: 1.600  
p=0.2059

## Breslow Depth

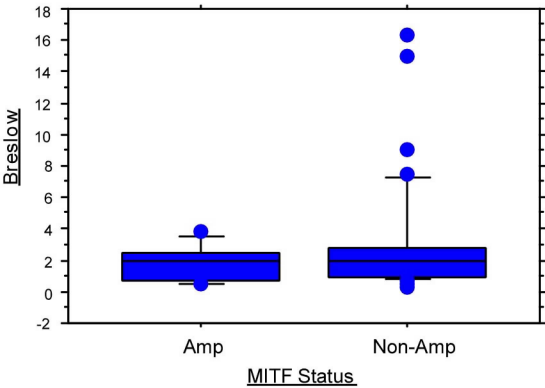

## Tumor Infiltrating Lymphocytes

|                          | MITF Status |         | Totals |
|--------------------------|-------------|---------|--------|
|                          | Amp         | Non-Amp |        |
| Absent                   | 0           | 0       | 0      |
| Brisk or diffuse         | 0           | 2       | 2      |
| Non-brisk or non-diffuse | 1           | 7       | 8      |
| Sparse                   | 0           | 7       | 7      |
| Totals                   | 1           | 16      | 17     |
