# Supplementary figures and images for: Integrative genomic analyses identify MITF as a lineage survival oncogene amplified in malignant melanoma
Source: Springer Nature journal article supplement (doi:10.1038/nature03664), 2005-07-01

Chromosome  
Color Legend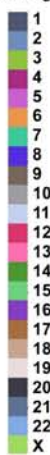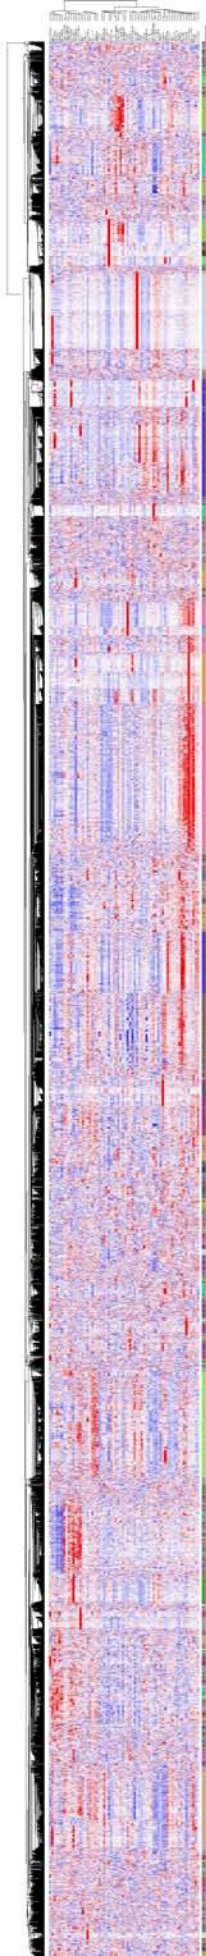

Supplement: 41586_2005_BFnature03664_MOESM1_ESM.pdf [file 41586_2005_BFnature03664_MOESM1_ESM.pdf]

**a**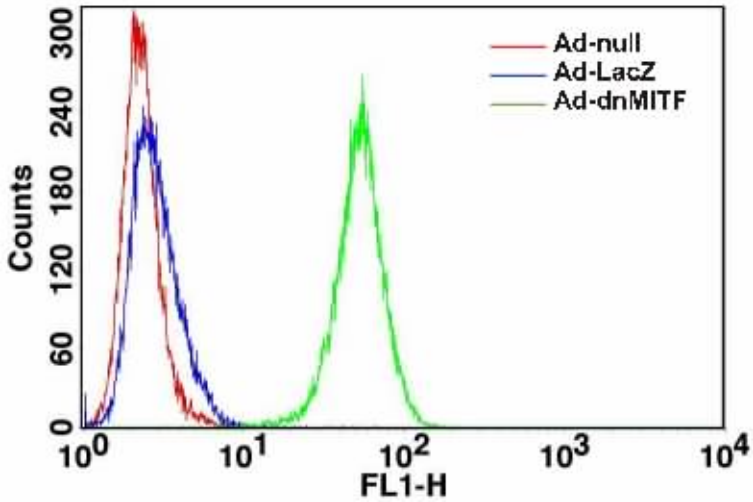**b**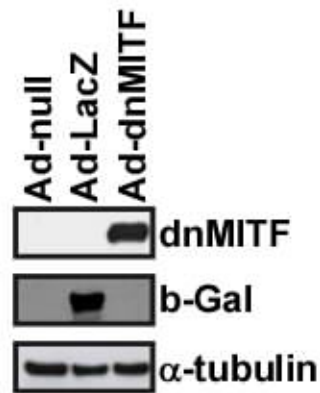**c**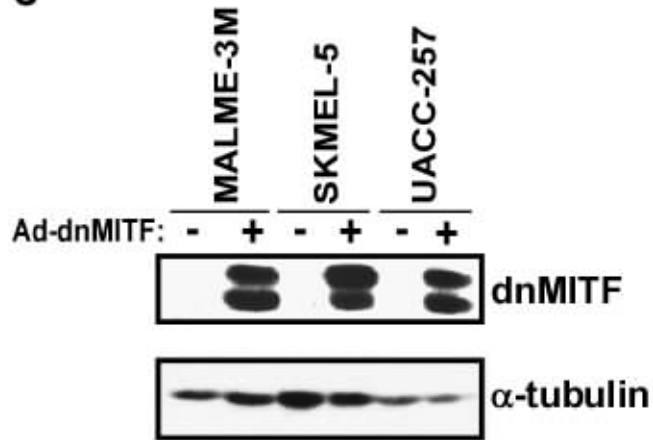

Supplement: 41586_2005_BFnature03664_MOESM4_ESM.pdf [file 41586_2005_BFnature03664_MOESM4_ESM.pdf]

# Supplementary Figure S5

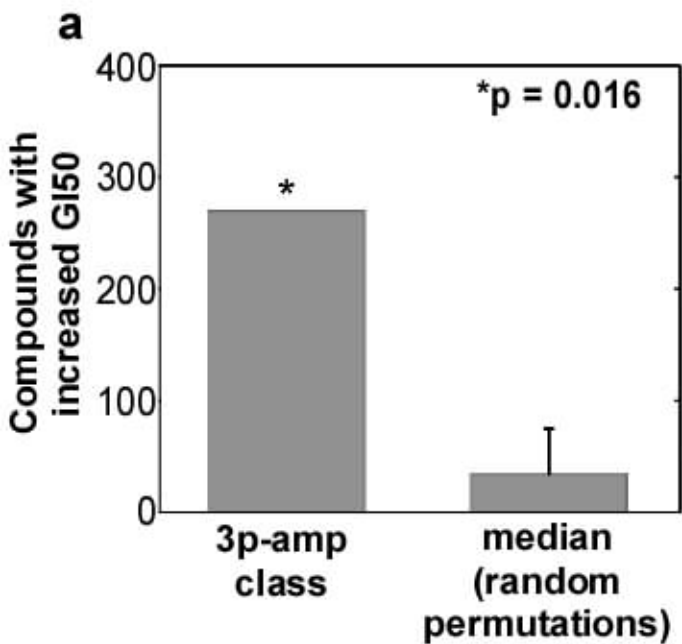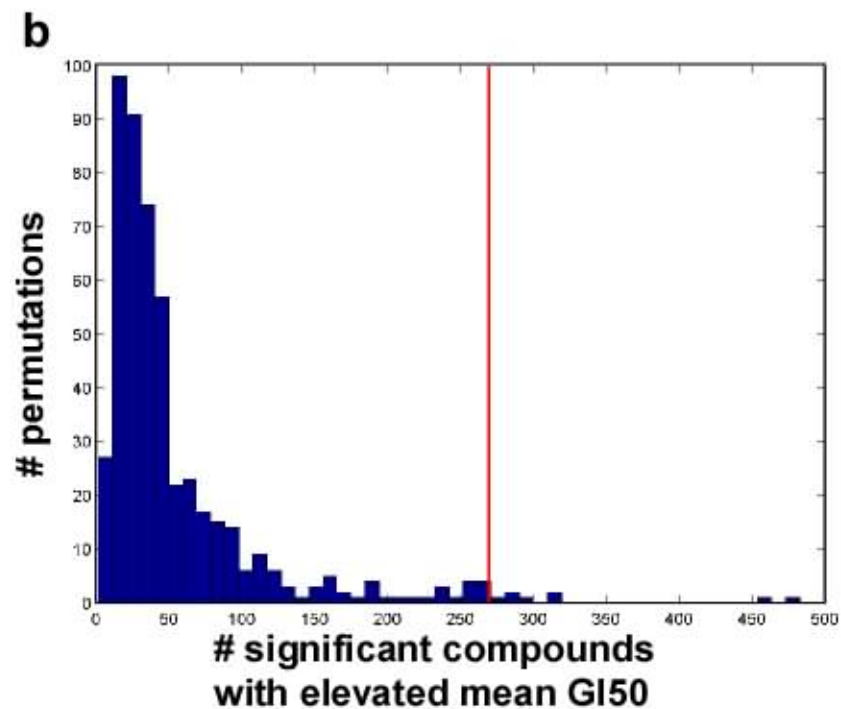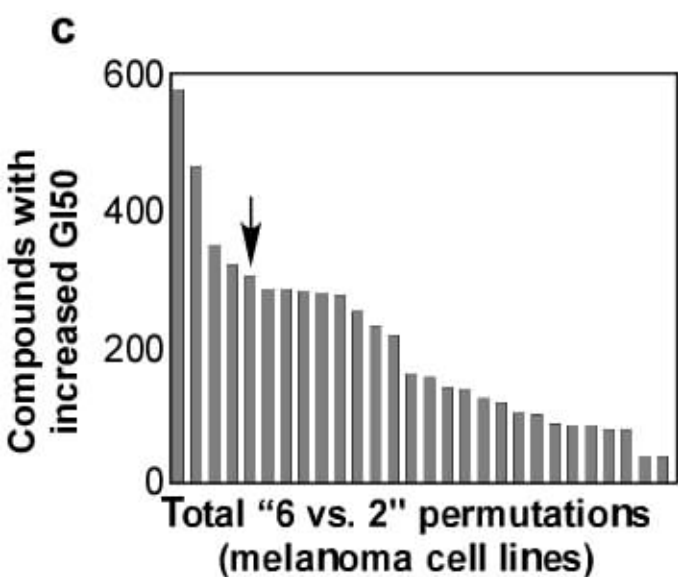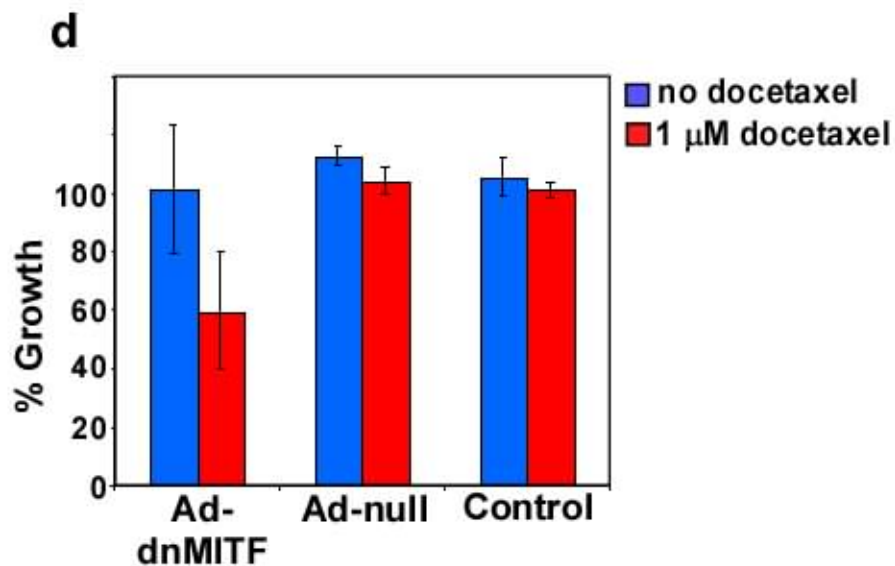

Supplement: 41586_2005_BFnature03664_MOESM5_ESM.pdf [file 41586_2005_BFnature03664_MOESM5_ESM.pdf]
